# Supplementary material for: A Continuum Model for Metabolic Gas Exchange in Pear Fruit
Source: PLoS Comput Biol. 2008 Mar 7;4(3):e1000023. doi: 10.1371/journal.pcbi.1000023 (PMC2265468; doi:10.1371/journal.pcbi.1000023)
Supplement: Text S1 — Appendix: Numerical scheme for the permeation-diffusion-reaction model. (0.04 MB DOC) [file pcbi.1000023.s001.doc]

**APPENDIX Numerical scheme for the permeation-diffusion-reaction model**

1. To ensure that the O2 concentration cannot become negative due to O2 consumption (), the respiration term in the permeation-diffusion-reaction model was modified for the O2 and CO2 in the solution:

If then (11) and (12)

If then and are described by Eq. (1) and (2).

Analytically, there is no O2 consumption when O2 reaches zero. Therefore, the O2 concentration should never become negative. It is clear that when the O2 concentration is positive, the reaction terms are the same as the original model. The solution, therefore, will be physically consistent.

2. Transformation of the governing equation

An exponential transformation of the main variable was used to impose positive values for the O2 concentration:

(13)

Hence, Eq. (7) for the O2 was transformed into

(14)

At the boundary (15)

The permeation model (Eq. (9)) was transformed into

(16)

Similarly, exponential transformation of the O2 concentration was applied in the respiration equations (1) and (2).
